# Supplementary material for: MicroRNA-101 targets von Hippel-Lindau tumor suppressor (VHL) to induce HIF1α mediated apoptosis and cell cycle arrest in normoxia condition
Source: PubMed Central journal article supplement (PMC4740907; doi:10.1038/srep20489), 2016-02-04
Supplement: srep20489-s1.pdf [file srep20489-s1.pdf]

**MicroRNA-101 targets von Hippel-Lindau tumor suppressor (VHL)  
to induce HIF1 $\alpha$  mediated apoptosis and cell cycle arrest in  
normoxia condition**

Ning Liu<sup>1</sup>, Wu-Yan Xia<sup>1</sup>, Shan-Shan Liu<sup>1</sup>, Hai-Yan Chen<sup>1</sup>, Lei Sun<sup>1</sup>,  
Meng-Yao Liu<sup>1</sup>, Lin-Feng Li<sup>1</sup>, Hong-Min Lu<sup>1</sup>, Yu-Jie Fu<sup>1</sup>, Pei Wang<sup>1</sup>, Hailong  
Wu<sup>1†</sup>, Jian-Xin Gao<sup>1†</sup>

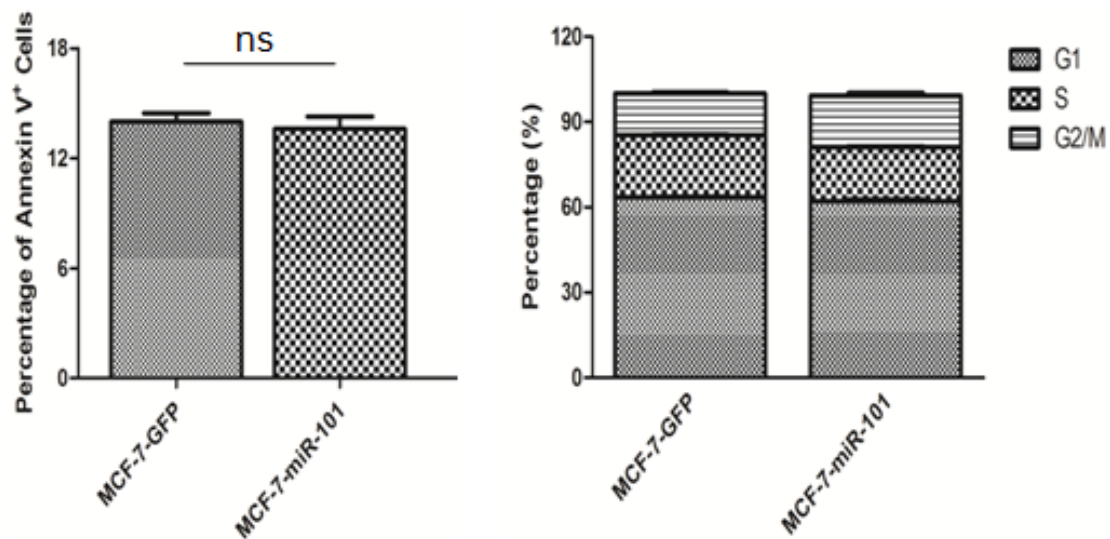

**Figure S1. *miR-101* has no effect on apoptosis and cell cycle in MCF-7 cells under hypoxia exposure.**

Apoptosis and cell cycle assays in MCF-7-miR-101 under hypoxia exposure.

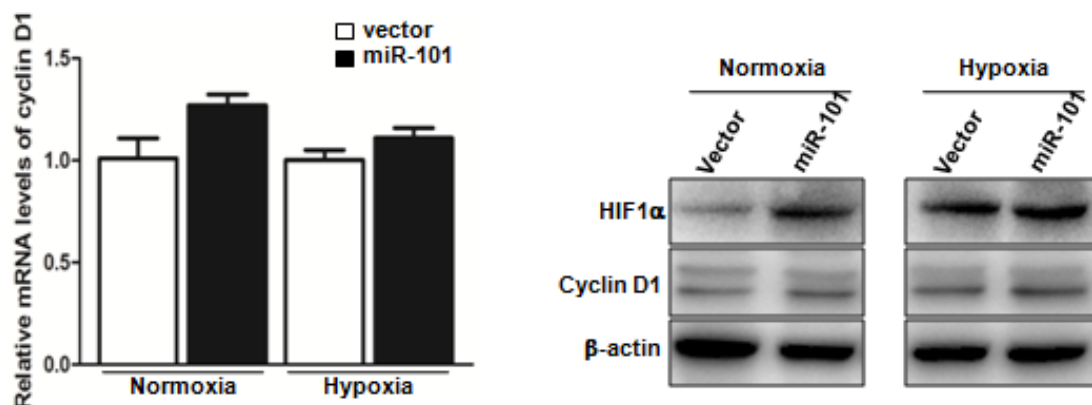

**Figure S2. *miR-101* does not affect cyclinD1 levels in either normoxia or hypoxia condition.**

mRNA and protein levels of CyclinD1 in MCF-7 cells with *miR-101* expression detected by qPCR and western respectively under normoxia or hypoxia condition.

**A**

|                    |                 |           |           |                                                                                                         |
|--------------------|-----------------|-----------|-----------|---------------------------------------------------------------------------------------------------------|
| <b>EGLN2(PHD1)</b> | hsa-miR-101-5p  | NM_089732 | 17-42     | 3' UCUG-AGUCGUGACAC <u>UAUUGAC</u> 5'<br>*   **   *****   *<br>5' GCGAGCAGC--TTAA <u>ATGACTT</u> 3'     |
|                    | hsa-miR-101-3p  | NM_022051 | 1341-1364 | 3' AAGUC--AAATAGUG-UC <u>ADGACU</u> 5'<br>**   *****   **   *<br>5' OCCAGCCTTCTT <u>ACTGTACTGAA</u> 3'  |
| <b>EGLN1(PHD2)</b> | hsa-miR-101-3p  | NM_022051 | 2450-2469 | 3' AAGUCAATAGUGUC <u>ADGACU</u> 5'<br>*****   *   *<br>5' ATAAAGCTTCATRA <u>TGCTGT</u> 3'               |
|                    | hsa-miR-101-5p  | NM_022051 | 1283-1305 | 3' UCGAGUCGUGACAC-- <u>UAUUGAC</u> 5'<br>*****   **   *<br>5' ACTGACCG--AATGTGCA <u>GTAACTC</u> 3'      |
| <b>EGLN3(PHD3)</b> | hsa-miR-101-5p  | NM_022073 | 814-834   | 3' UCGAGU-CUGGAC <u>UAUUGAC</u> 5'<br>*   *   **   *<br>5' TGTGTTAACCAC--TG <u>ATACTG</u> 3'            |
|                    | hsa-miR-101-5p  | NM_022073 | 1176-1198 | 3' UCGAGUCGUGAC---AC <u>UAUUGAC</u> 5'<br>***   *   *****   *<br>5' CAGATC-GCACTGCTCA <u>ATAACTT</u> 3' |
| <b>P4HTM(PHD4)</b> | hsa-miR-101-3p  | NM_177938 | 146-170   | 3' AAGU-CAGUAG---UGUC <u>ADGACU</u> 5'<br>*   *   *****   *<br>5' TTCATGTTATTATTG <u>TGACTGAC</u> 3'    |
|                    | hsa-miR-103a-3p | NM_177938 | 57-82     | 3' AGU-ABCUGGA-CAGSUA <u>ACGACA</u> 5'<br>*   *   *****   *<br>5' CCGCTGTCTCTGTG <u>CTGCA</u> 3'        |

**B**

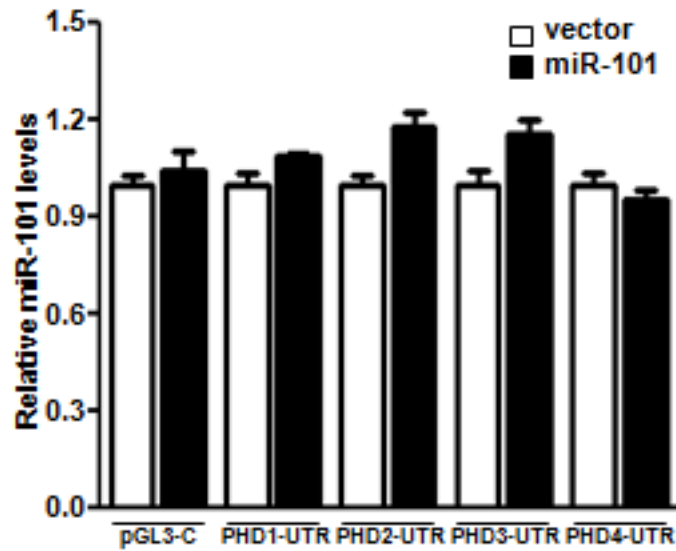

**Figure S3. PHD1-4 are not the direct target of *miR-101*.**

(A) Predicted binding sites of *miR-101* on the 3'UTR regions of PHD1-4 by FINDTAR3. (B) Effect of *miR-101* on the luciferase activity of pGL3-control, PHD1-UTR, PHD2-UTR, PHD3-UTR and PHD4-UTR.
